# Supplementary material
Source: PubMed Central journal article supplement (PMC3382458)
Supplement: cn300008p_si_001.pdf [file cn300008p_si_001.pdf]

| Gene name     | Forward primer         | Reverse primer         | Size/Genomic  | %GC   | Tm | Correlation coefficient | $\Delta$ Ct average | STDEV |
|---------------|------------------------|------------------------|---------------|-------|----|-------------------------|---------------------|-------|
| Gpr50         | TGGCTGTGACCAAGAACAAG   | GTGACCAACCCGACCATC     | 172/2694 bp   | 50-61 | 63 | 0.982                   | 3.625               | 1.67  |
| Nogo-pan      | TTGGCCCTGCTCTCTGTG     | CCAATTCCTCTGATATGGCAAC | 130/2649bp    | 45-61 | 63 | 0.992                   | 12.403              | 0.77  |
| Nogo-A        | GGCTCGGGCTCAGTGG       | CAGGACAGATGGGAAATCCTC  | 147/12806 bp  | 52-75 | 60 | 0.989                   | 11.781              | 0.80  |
| Cdh8          | TGAGCCGCTCCAAAAGAG     | TTGTGCCAGCTCCATCAC     | 156/121,178bp | 56    | 63 | 0.989                   | 9.153               | 1.03  |
| Abca2         | TTCATCCCGCTTGTCTCTC    | ATCAGGGCAAAGCGACTG     | 141/1148 bp   | 56    | 63 | 0.990                   | 6.293               | 2.06  |
| Control genes |                        |                        |               |       |    |                         |                     |       |
| Actin-B       | GATCTGGCACCACACCTTCTAC | TGGATGGCTACGTACATGGCTG | 159/613bp     | 55    | 55 | 1.00                    | 17.458              | 0.86  |
| Tbp           | GCCAGACCCCACTC         | ACAGCCAAGATTCACGGTAG   | 182/2877 bp   | 50-64 | 60 | 0.991                   | 8.115               | 1.12  |
| Hmbs          | CTGAAGGATGTGCCTACCATAC | AAGGTTTCCAGGGTCTTTCC   | 122/1084 bp   | 50    | 63 | 0.999                   | 8.491               | 0.82  |
| Cyclophilin   | GGAGATGGCACAGGAGGAAA   | CCCGTAGTGCTTCAGCTTGAA  | 75 bp/-       | 55-52 | 65 | 0.998                   | 12.341              | 0.81  |

**Supplementary Table 1. Primers and parameters used in this study.** Shown are primer name, sequence of forward and reverse primer, cDNA/genomic DNA size (bp), GC%, Tmelt, calculated correlation coefficient from optimized primers, Average Ct value and Standard deviation from the average Ct value.
