# Supplementary material
Source: PubMed Central journal article supplement (PMC3382458)
Supplement: cn300008p_si_002.pdf [file cn300008p_si_002.pdf]

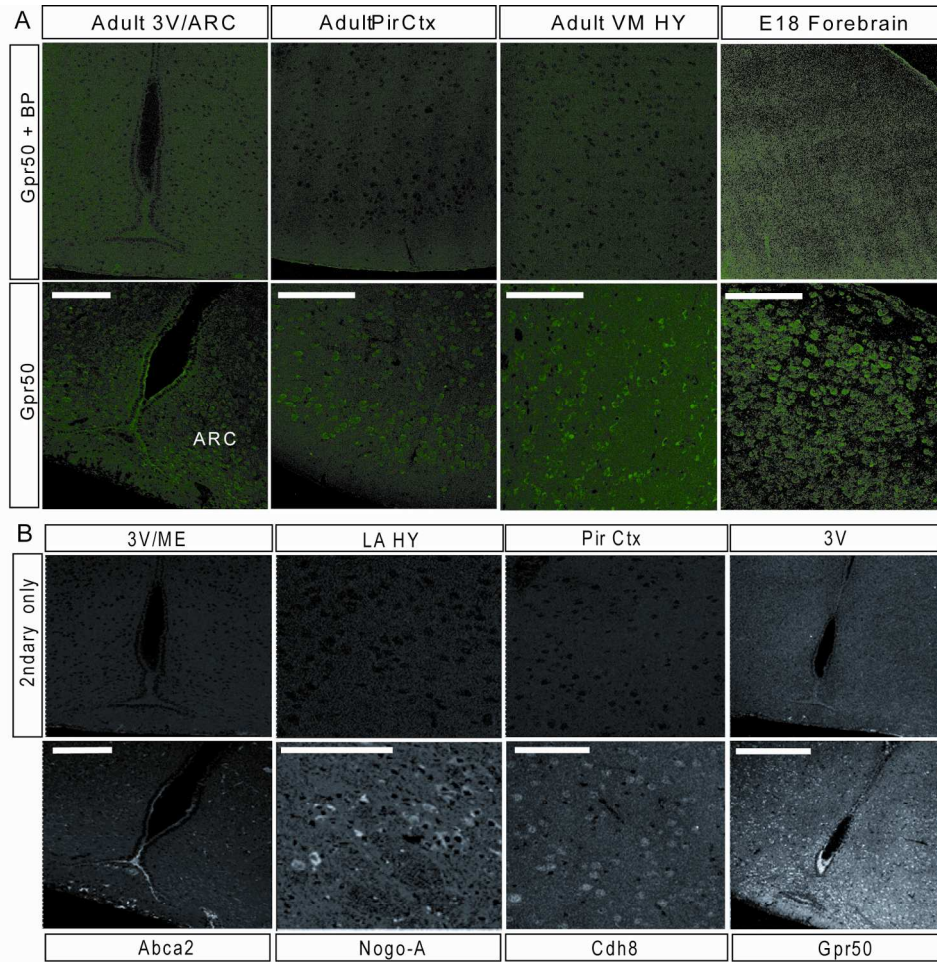

Supplementary Figure 1. Adult CD1 mice brain were fixed in Methacarn. (A) Sections were probed with Gpr50 antibody plus Gpr50 blocking peptide (BP) or Gpr50 alone and stained with Alexafluor 488 (488). (B) Sections were incubated with secondary antibody only (donkey anti-rabbit 594 or donkey anti-goat 488) or Abca2, Nogo-A, Cdh8 or Gpr50 primary antibody followed by a donkey anti-rabbit 594 secondary antibody. Scale bars: 100  $\mu$ m. 3V = 3rd ventricle, Pir Ctx = piriform cortex, VMH = ventromedial hypothalamus, ARC = arcuate nucleus, LA HY = lateral hypothalamus.

173x190mm (300 x 300 DPI)
