# Supplementary material
Source: PubMed Central journal article supplement (PMC3382458)
Supplement: cn300008p_si_003.pdf [file cn300008p_si_003.pdf]

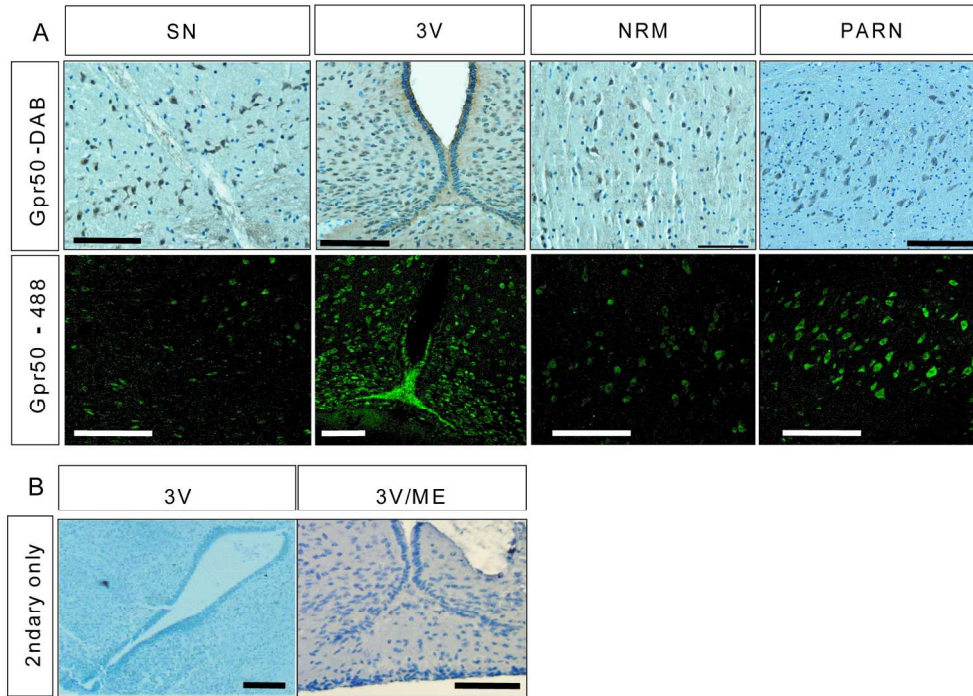

Supplementary Figure 2. Gpr50 DAB chromogenic and fluorescent images. Adult CD1 mice brain were fixed in 70% EtOH or Methacarn, probed with Gpr50 antibody and stained with DAB or a Alexafluor 488 (488) (A) or with a rabbit anti-goat HRP secondary antibody only (B). Cells were counterstained with haematoxylin. Scale bars: 100  $\mu$ m. SN = substantia nigra, 3V = 3rd ventricle, NRM = nucleus raphe magnus, PARN = parvicellular reticular nucleus, ME = median eminence.

172x139mm (300 x 300 DPI)
